# Supplementary material for: Catalytic effect of microflow space for supramolecular block co-polymerization of water-soluble porphyrins
Source: Royal Society of Chemistry journal article supplement (doi:10.1039/d4cc02003k), 2024-01-01
Supplement: d4cc02003k1.pdf [file d4cc02003k1.pdf]

## 1. General

The UV-vis spectra were recorded using a JASCO V-670 spectrometer equipped with a thermal controller. Atomic force microscopy (AFM) images were acquired in air using a Shimadzu SPM 9600 microscope (dynamic mode). Each sample was cast onto mica and dried for 6 h under reduced pressure prior to observation. Dynamic light scattering (DLS) data were obtained using a Malvern Zetasizer Nano ZS. All reagents and solvents were purchased from Tokyo Chemical Industry, Wako Pure Chemical Industries, and Nacalai Tesque.

## 2. Microflow design

A glass microflow chip was used in this study. The microchannel was designed with a depth of 45  $\mu\text{m}$ , top width of 190  $\mu\text{m}$ , bottom width of 100  $\mu\text{m}$ , and total channel length of 60 mm.

## 3. Experimental section

### Syntheses of $\text{H}_2\text{TPPS}_2\text{-NHCO-EG}_x$ ( $x = 2, 4, 6, 8, 18$ ) porphyrin derivatives

The  $\text{H}_2\text{TPPS}_2\text{-NHCO-EG}_x$  ( $x = 2, 4, 6, 8, \text{ and } 18$ ) porphyrin derivatives were synthesized according to previously reported procedures.<sup>1,2</sup>

### General experiments using microflow device

A solution was introduced into the microflow channel through a Teflon capillary (inner mm diameter: 300  $\mu\text{m}$ ; length: 80 mm). The flow rate was adjusted using a syringe pump. The eluted solution was collected in a vial through a Teflon capillary (inner diameter: 300  $\mu\text{m}$ ; length: 80 mm) and subjected to spectroscopic and microscopic observations.

### Preparation of $\text{H}_2\text{TPPS}_4$ supramolecular polymer

A solution  $\text{H}_2\text{TPPS}_2$  in ultrapure water (800  $\mu\text{M}$ ) was mixed with aqueous HCl (pH 2) in a vial. The final concentration was adjusted to 40  $\mu\text{M}$ . The solution was allowed to stand for 70 min. As revealed in Fig. S1, the solution contained short nanofibers with an average length of 0.85  $\mu\text{m}$ . This solution was used as a stock solution for fabricating the  $\text{H}_2\text{TPPS}_4$  supramolecular polymer.

### Preparation of $\text{H}_2\text{TPPS}_2\text{-NHCO-EG}_x$ monomer solution<sup>1,2</sup>

A MeOH solution of the  $\text{H}_2\text{TPPS}_2\text{-NHCO-EG}_x$  ( $x = 2, 4, 6, 8, \text{ and } 18$ ) porphyrin derivative was mixed with an aqueous HCl solution by adjusting the final water/MeOH solvent

composition to 9/1. The final concentration was adjusted to 30, 50, and 70  $\mu\text{M}$ . These solutions were used as stock solutions for the  $\text{H}_2\text{TPPS}_2\text{-NHCO-EG}_x$  monomer.

### Supramolecular copolymerization in a vial

A  $\text{H}_2\text{TPPS}_2\text{-NHCO-EG}_x$  monomer (30, 50, or 70  $\mu\text{M}$ ) solution in a water/MeOH mixture was added to an acidic aqueous solution of the pre-prepared  $\text{H}_2\text{TPPS}_4$  supramolecular polymer (40  $\mu\text{M}$ ). The final water/MeOH ratio was adjusted to 96/4 (v/v). The solution of the  $\text{H}_2\text{TPPS}_4$  supramolecular polymer was diluted by 3/5 (i.e., the final concentration was 24  $\mu\text{M}$ ). The final monomer concentration was 12, 20, or 28  $\mu\text{M}$ .

### Supramolecular copolymerization in microflow channel

The acidic aqueous solution of the  $\text{H}_4\text{TPPS}_4$  supramolecular polymer (40  $\mu\text{M}$ ) was injected into the central inlet of the cross-type microchannel, with a flow rate of 60  $\mu\text{L}/\text{min}$ . A solution of  $\text{H}_2\text{TPPS}_2\text{-NHCO-EG}_x$  monomer was injected from two lateral inlets, with a flow rate of 20  $\mu\text{L}/\text{min}$ , giving a total flow rate of 100  $\mu\text{L}/\text{min}$ . The concentration of the monomer solution was varied from 30, 50, to 70  $\mu\text{M}$  while fixing the polymer concentration. After elution from the microflow channel, the  $\text{H}_4\text{TPPS}_4$  supramolecular polymer solution was diluted by 3/5 (i.e., 24  $\mu\text{M}$ ). Likewise, the monomer solution was diluted by 2/5 (i.e., 12, 20, 28  $\mu\text{M}$ ). The eluted solutions were collected in a vial and subjected to UV-vis and DLS measurements, and AFM observations.

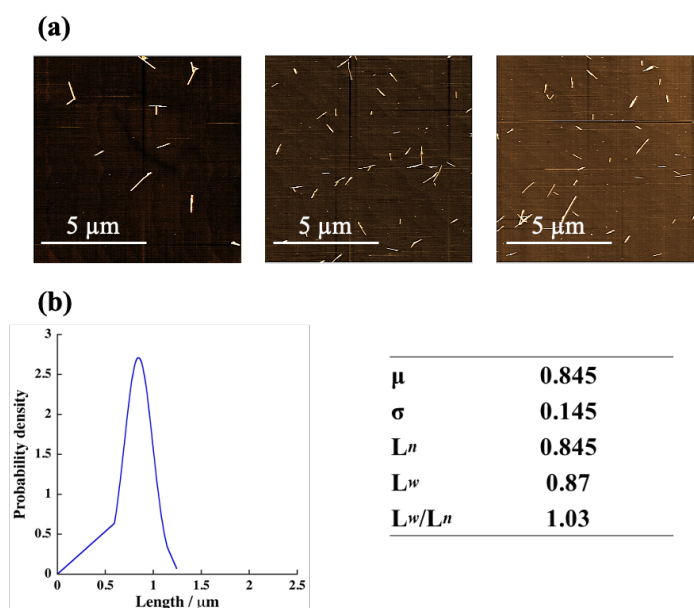

Fig. S1. AFM images of the pre-prepared  $\text{H}_4\text{TPPS}_4$  supramolecular polymers and characteristics of the resultant polymers, measured from the AFM images of at least 300 fibers;  $\mu$ : mean length ( $\mu\text{m}$ );  $\sigma$ : standard deviation of measured lengths;  $L^n$ : number-average length;  $L^w$ : weight-average length;  $L^w/L^n$ : dispersity.

#### 4. Concentration-dependent supramolecular copolymerization in microflow channel

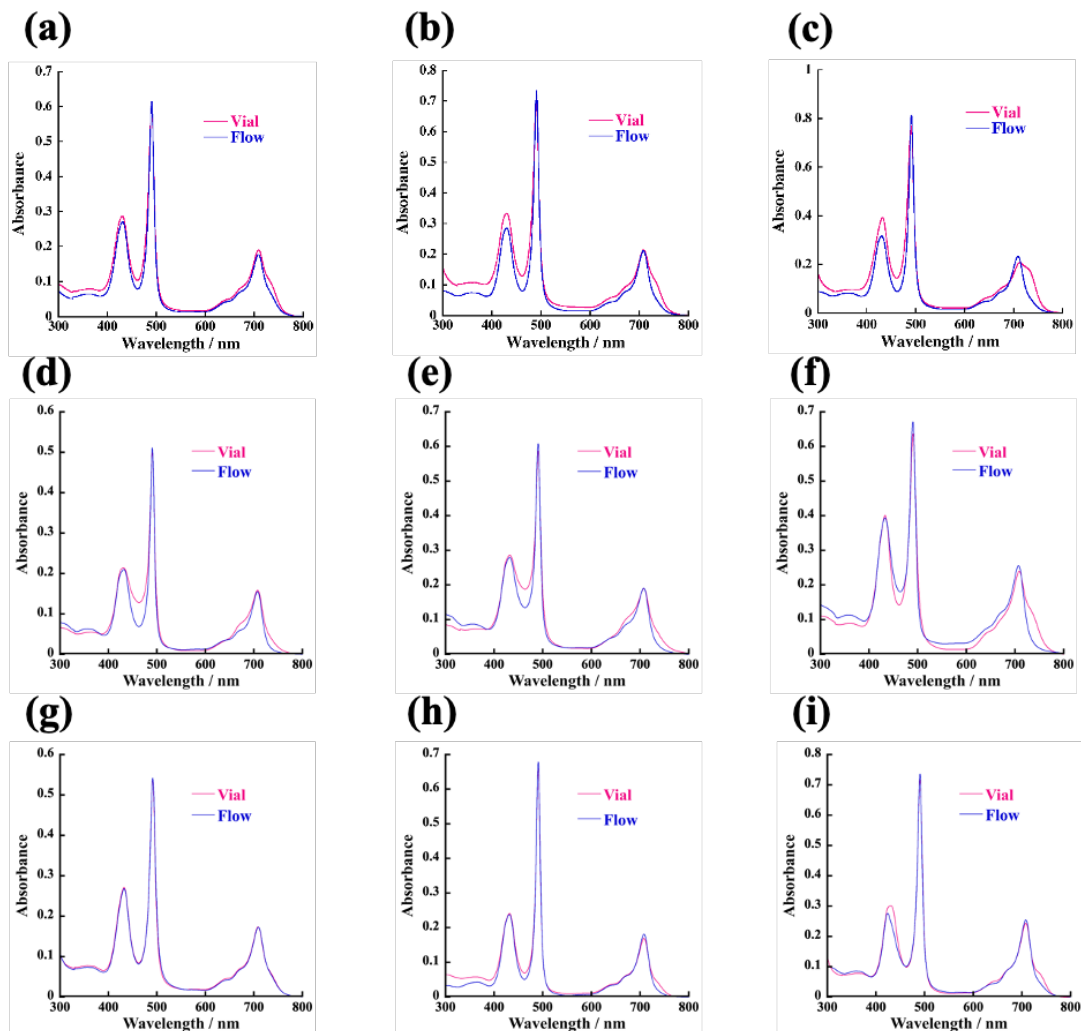

Fig. S2. Comparison of UV-vis spectra of vial (magenta lines) and flow (blue lines) samples upon supramolecular polymerization; (a–c) addition of (a) 30, (b) 50, and (c) 70  $\mu\text{M}$  of  $\text{H}_2\text{TPPS}_2\text{-NHCO-EG}_2$ ; (d–f) addition of (d) 30, (e) 50, and (f) 70  $\mu\text{M}$  of  $\text{H}_2\text{TPPS}_2\text{-NHCO-EG}_4$ ; (g–i) addition of (g) 30, (h) 50, and (i) 70  $\mu\text{M}$  of  $\text{H}_2\text{TPPS}_2\text{-NHCO-EG}_6$ .

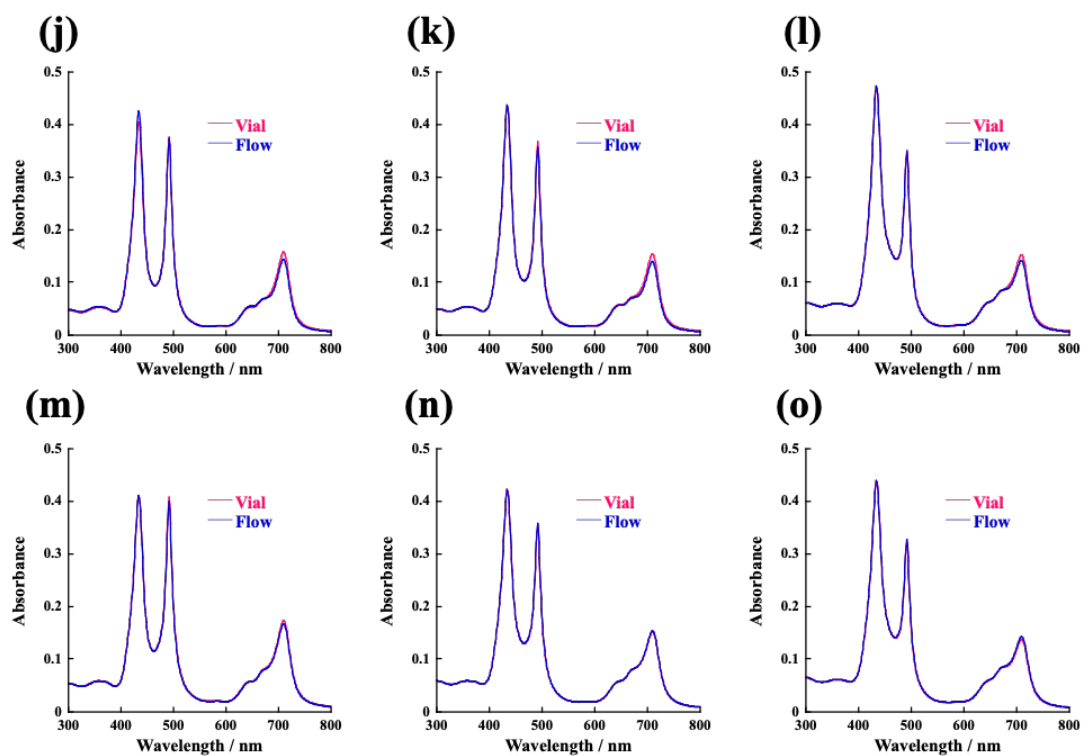

Fig. S2 continued. (j–l) addition of (a) 30, (b) 50, and (c) 70  $\mu\text{M}$  of  $\text{H}_2\text{TPPS}_2\text{-NHCO-EG}_8$ ; (m–o) addition of (d) 30, (e) 50, and (f) 70  $\mu\text{M}$  of  $\text{H}_2\text{TPPS}_2\text{-NHCO-EG}_{18}$  [1.0 mm cell, r.t., water/MeOH; 96/4 (v/v), the concentration of injected  $\text{H}_2\text{TPPS}_4$  monomer was fixed at 40  $\mu\text{M}$ ].

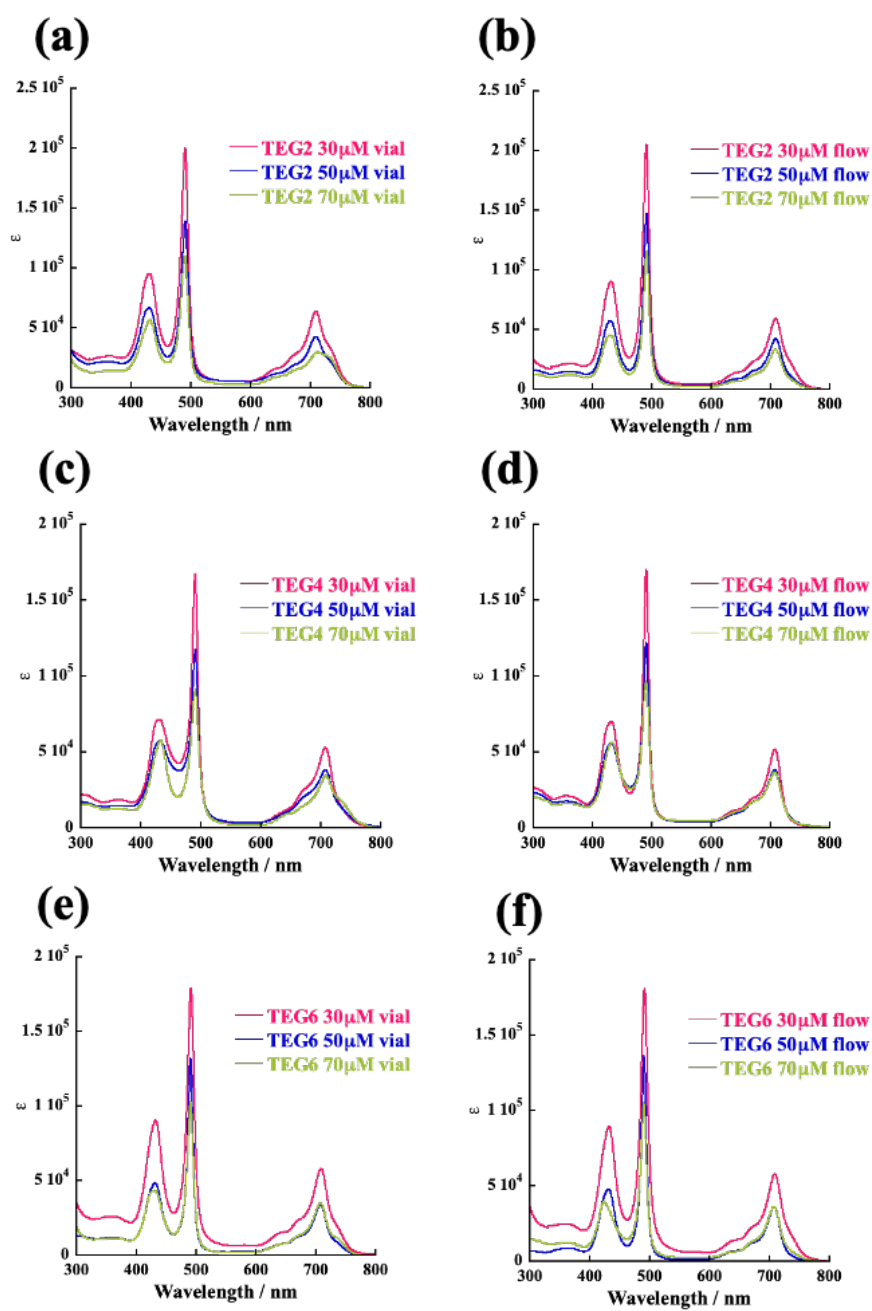

Fig. S3. Comparison of concentration-dependent UV-vis spectral changes upon supramolecular polymerization in vial (a, c, e, g, i) and flow channel (b, d, f, h, j); upon addition of (a, b)  $\text{H}_2\text{TPPS}_2\text{-NHCO-EG}_2$ , (c, d)  $\text{H}_2\text{TPPS}_2\text{-NHCO-EG}_4$ , and (e, f)  $\text{H}_2\text{TPPS}_2\text{-NHCO-EG}_6$ .

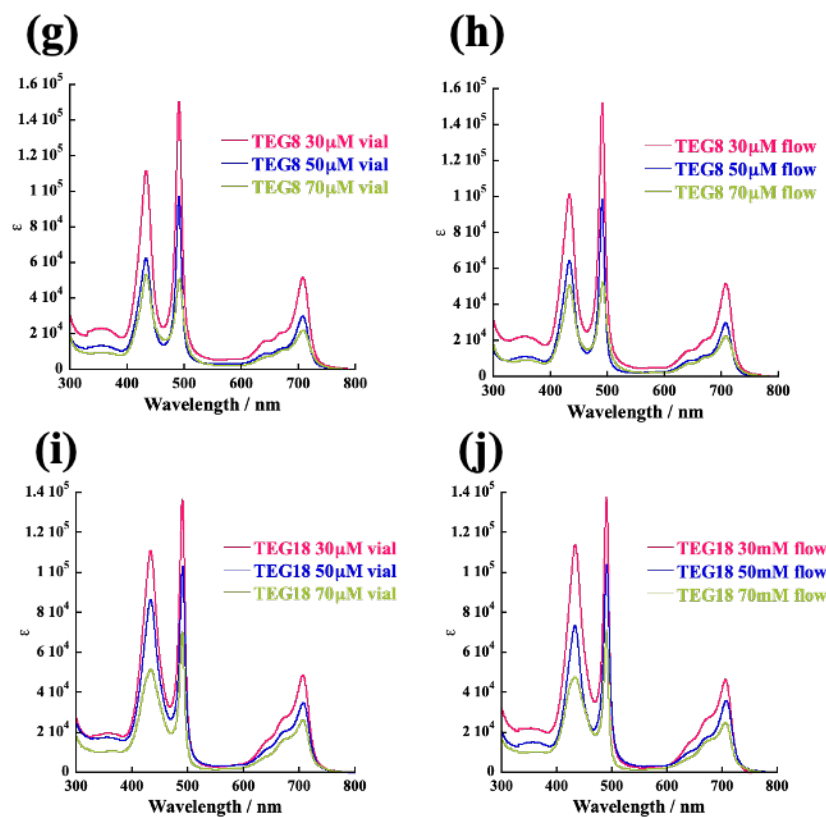

Fig. S3 continued. (g, h) H<sub>2</sub>TPPS<sub>2</sub>-NHCO-EG<sub>8</sub>, (i, j) H<sub>2</sub>TPPS<sub>2</sub>-NHCO-EG<sub>18</sub> [1.0 mm cell, r.t., water/MeOH; 96/4 (v/v), the inset values represent the concentration of added monomer].

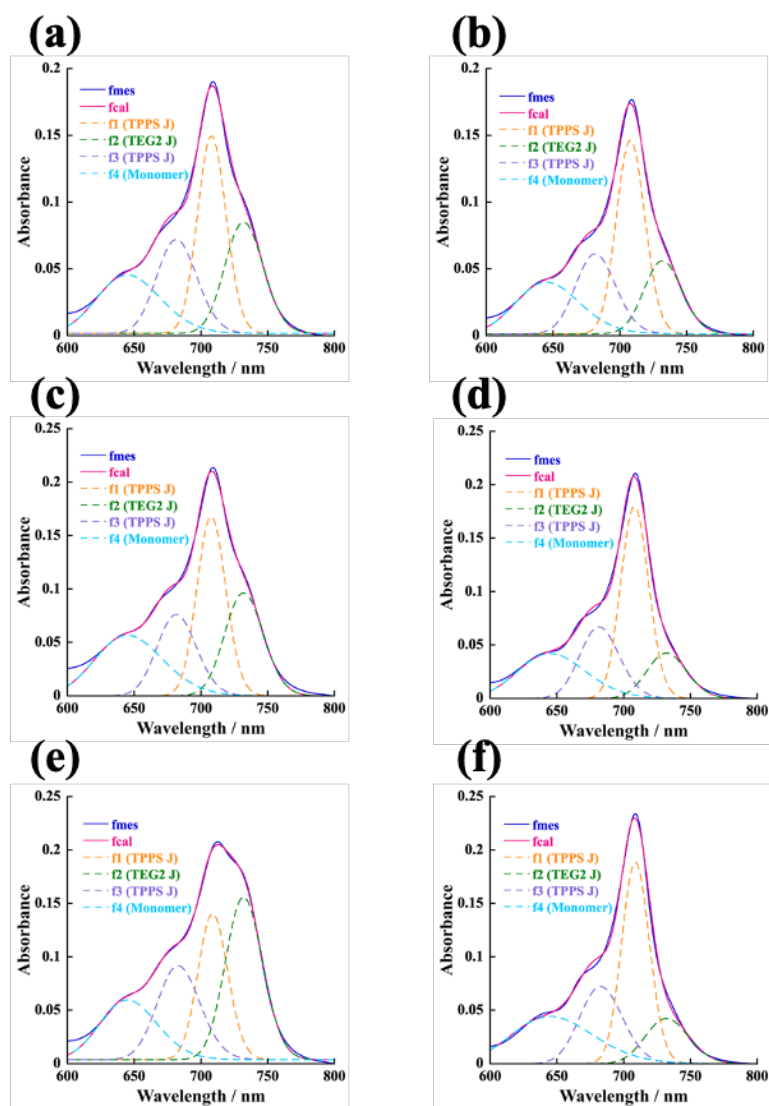

Fig. S4. Deconvoluted UV-vis spectra upon supramolecular polymerization in vial (a, c, e) and flow channel (b, d, f) upon addition of (a, b) 30, (c, d) 50, and (e, f) 70  $\mu\text{M}$  of  $\text{H}_2\text{TPPS}_2\text{-NHCO-EG}_2$  [1.0 mm cell, r.t., the concentration of injected solution of  $\text{H}_4\text{TPPS}_4$  supramolecular polymer was fixed at 40  $\mu\text{M}$ ; for the inset; blue lines: measured spectra, magenta: calculated spectra, f1 orange:  $\text{H}_4\text{TPPS}_4$  J-aggregate, f2 green:  $\text{H}_4\text{TPPS}_2\text{-NHCO-EG}_2$  aggregate, f3 purple: second band of  $\text{H}_4\text{TPPS}_4$  J-aggregate, f4 light-blue: unreacted  $\text{H}_4\text{TPPS}_4$  monomer].

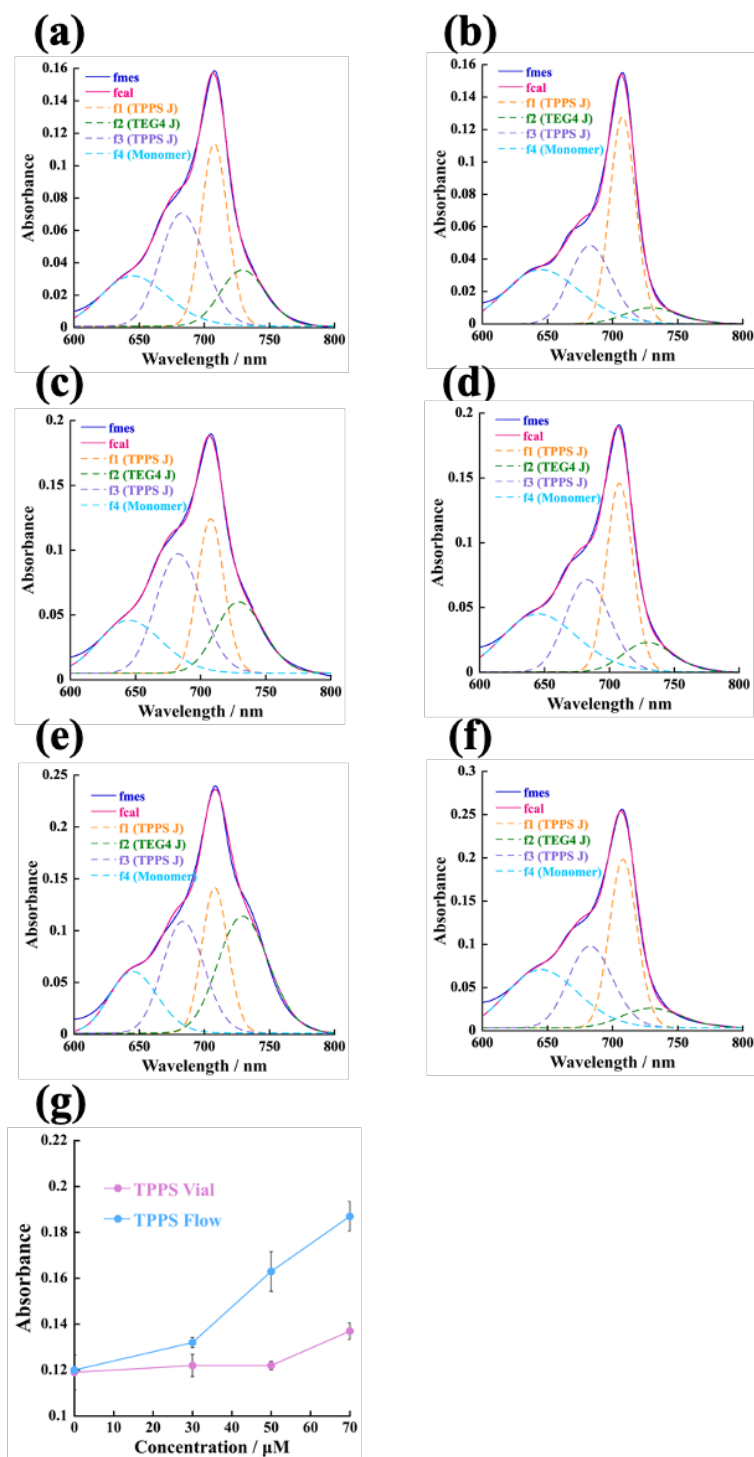

Fig. S5. Deconvoluted UV-vis spectra upon supramolecular polymerization in vial (a, c, e) and flow channel (b, d, f) upon addition of (a, b) 30, (c, d) 50, and (e, f) 70  $\mu\text{M}$  of  $\text{H}_2\text{TPPS}_2\text{-NHCO-EG}_4$  [1.0 mm cell, r.t., the concentration of injected solution of  $\text{H}_4\text{TPPS}_4$  supramolecular polymer was fixed at 40  $\mu\text{M}$ . Inset—blue lines: measured spectra, magenta: calculated spectra, f1 orange:  $\text{H}_4\text{TPPS}_4$  J-aggregate, f2 green:  $\text{H}_4\text{TPPS}_4\text{-NHCO-EG}_4$  aggregate, f3 purple: second band of  $\text{H}_4\text{TPPS}_4$  J-aggregate, f4 light-blue: unreacted  $\text{H}_4\text{TPPS}_4$  monomer]. (g) Plots of absorbance at 708 nm with respect to monomer concentration (for plots at 732 nm, see Fig. S7b).



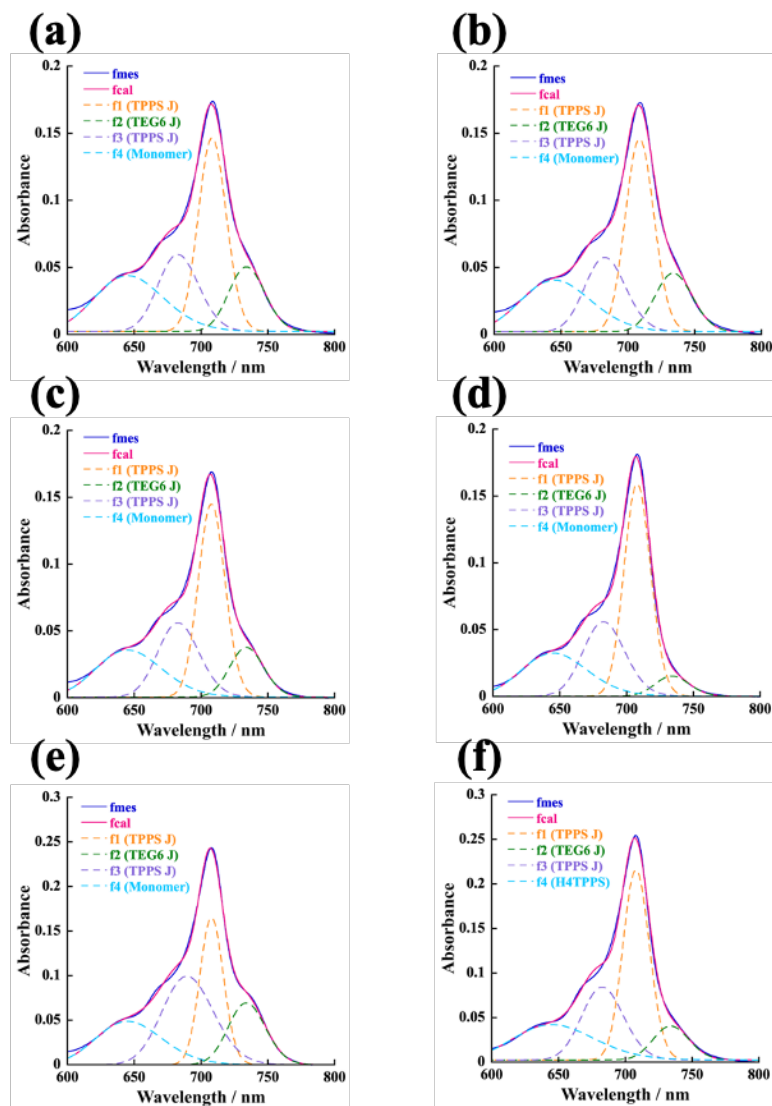

Fig. S6. Deconvoluted UV-vis spectra upon supramolecular polymerization in vial (a, c, e) and in flow channel (b, d, f) upon addition of (a, b) 30, (c, d) 50, (e, f) 70  $\mu\text{M}$  of  $\text{H}_2\text{TPPS}_2\text{-NHCO-EG}_6$  [1.0 mm cell, r.t., the concentration of injected solution of  $\text{H}_4\text{TPPS}_4$  supramolecular polymer was fixed at 40  $\mu\text{M}$ ; inset—blue lines: measured spectra, magenta: calculated spectra, f1 orange:  $\text{H}_4\text{TPPS}_4$  J-aggregate, f2 green:  $\text{H}_4\text{TPPS}_2\text{-NHCO-EG}_6$  aggregate, f3 purple: second band of  $\text{H}_4\text{TPPS}_4$  J-aggregate, f4 light-blue: unreacted  $\text{H}_4\text{TPPS}_4$  monomer].

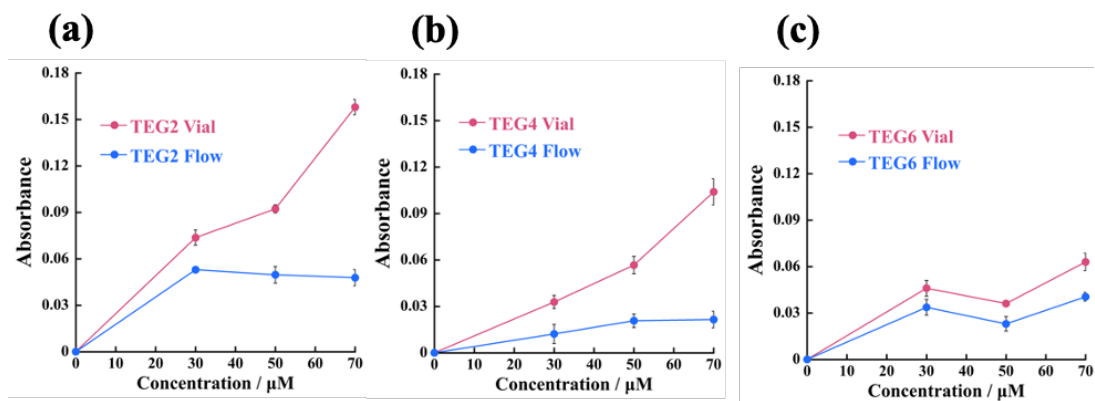

Fig. S7. Plots of absorbance at 732 nm (corresponding to homopolymer) versus monomer concentration (red line: vial sample, blue line: flow sample) upon addition of (a)  $\text{H}_2\text{TPPS}_2\text{-NHCO-EG}_2$ , (b)  $-\text{EG}_4$ , and (c)  $-\text{EG}_6$ .

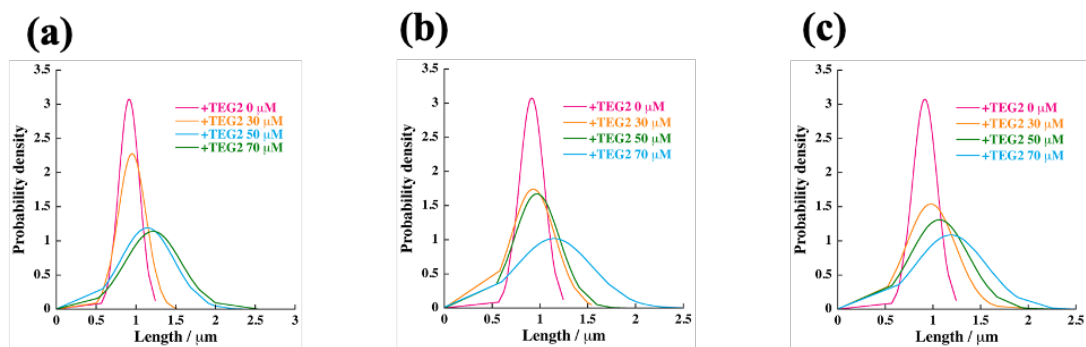

Fig. S8. (a–c) Length distributions of supramolecular polymers. The data were collected from three different samples, a, b, and c. For each sample, the length of the nanofibers was measured from the AFM images of at least 100 fibers (values in inset: concentrations of added monomer).

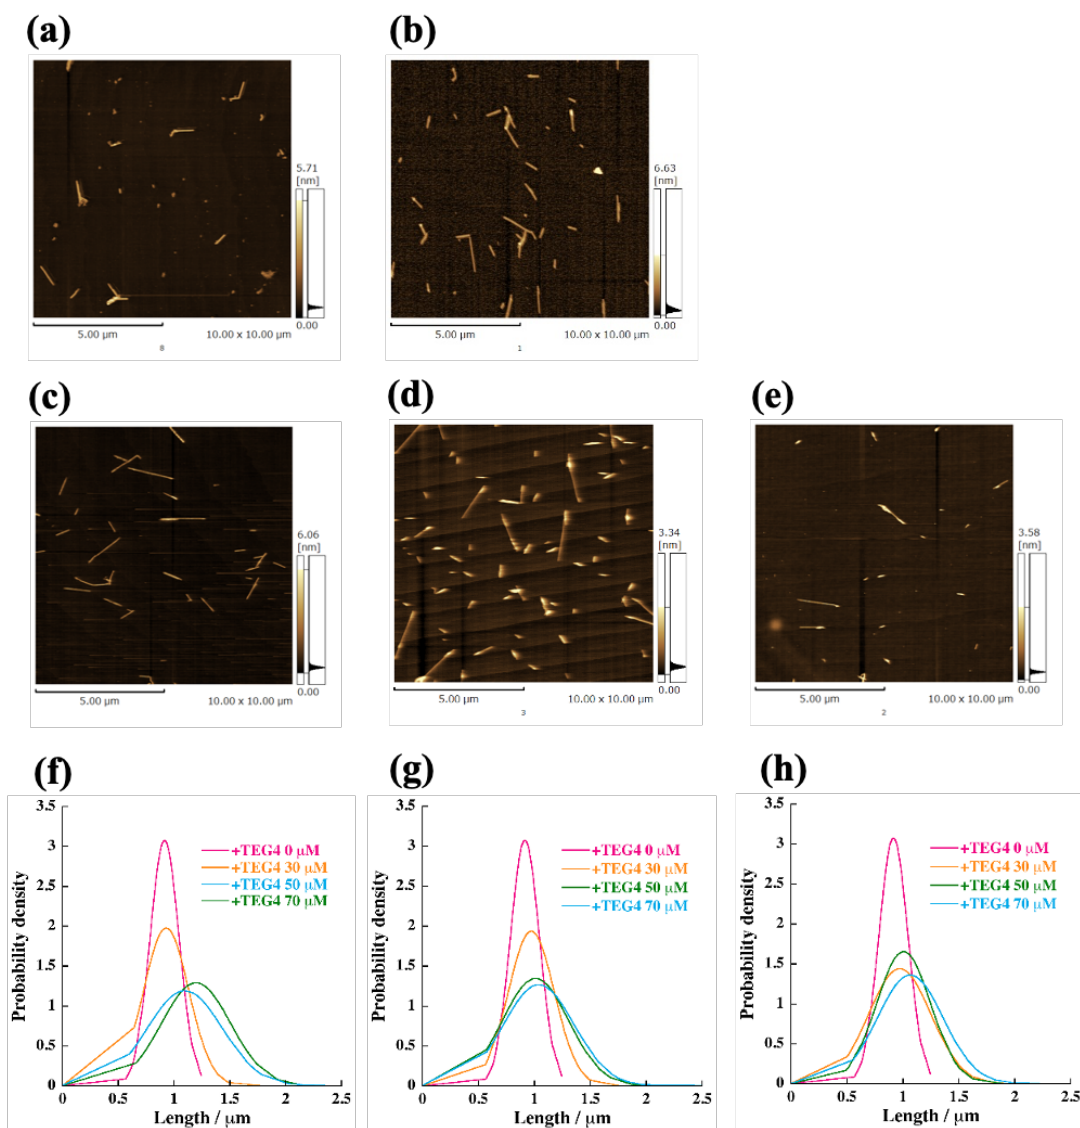

Fig. S9. (a–d) Concentration-dependent AFM images of  $H_4TPPS_4/-EG_4$  block copolymer prepared upon addition of (a) 0, (b) 30, (c) 50, and (d) 70  $\mu\text{M}$  of  $H_2TPPS_2-NHCO-EG_4$ ; (e) AFM image of nanofibers prepared in vial upon addition of 70  $\mu\text{M}$  of  $H_2TPPS_2-NHCO-EG_4$ ; (f–h) length distributions of supramolecular polymers. The data were collected from three different samples, f, g, and h. For each sample, the length of the nanofibers was measured from the AFM images of at least 100 fibers (values in inset: concentrations of added monomer).

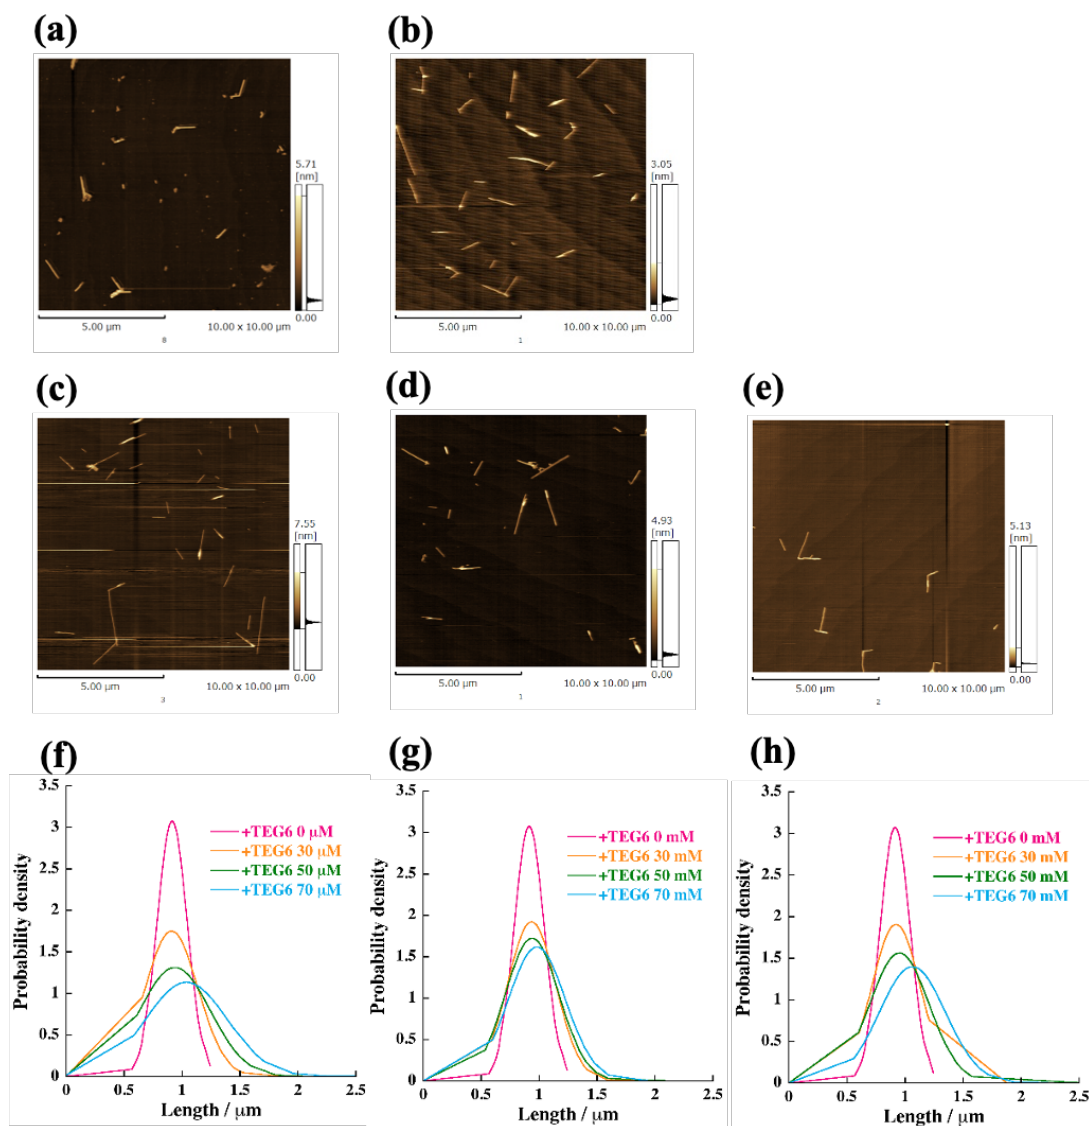

Fig. S10. (a–d) Concentration-dependent AFM images of  $H_4TPPS_4$ - $EG_6$  block copolymer prepared upon addition of (a) 0, (b) 30, (c) 50, and (d) 70  $\mu M$  of  $H_2TPPS_2$ - $NHCO$ - $EG_6$ ; (e) AFM image of nanofibers prepared in vial upon addition of 70  $\mu M$  of  $H_2TPPS_2$ - $NHCO$ - $EG_6$ ; (f–h) length distributions of supramolecular polymers. The data were collected from three different samples, f, g, and h. For each sample, the length of the nanofibers was measured from the AFM images of at least 100 fibers (values in inset: concentrations of added monomer).

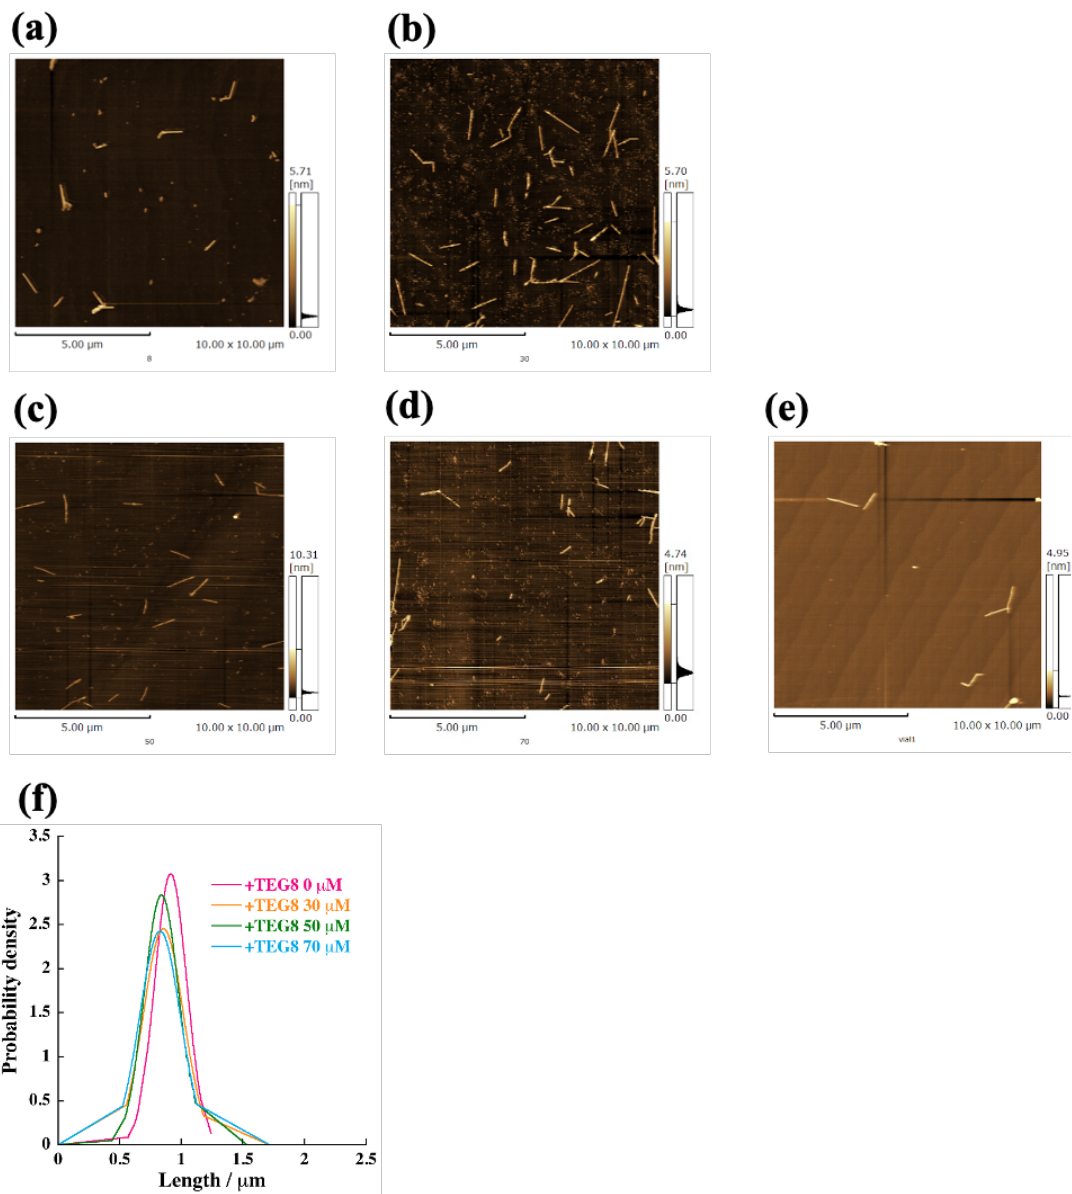

Fig. S11. (a–d) Concentration-dependent AFM images of supramolecular polymer prepared upon addition of (a) 0, (b) 30, (c) 50, and (d) 70  $\mu\text{M}$  of  $\text{H}_2\text{TPPS}_2\text{-NHCO-EG}_8$ ; (e) AFM image of nanofibers prepared in vial upon addition of 70  $\mu\text{M}$  of  $\text{H}_2\text{TPPS}_2\text{-NHCO-EG}_8$ ; (f) length distributions of supramolecular polymers measured from AFM images of at least 300 fibers (values in inset: concentrations of added monomer).

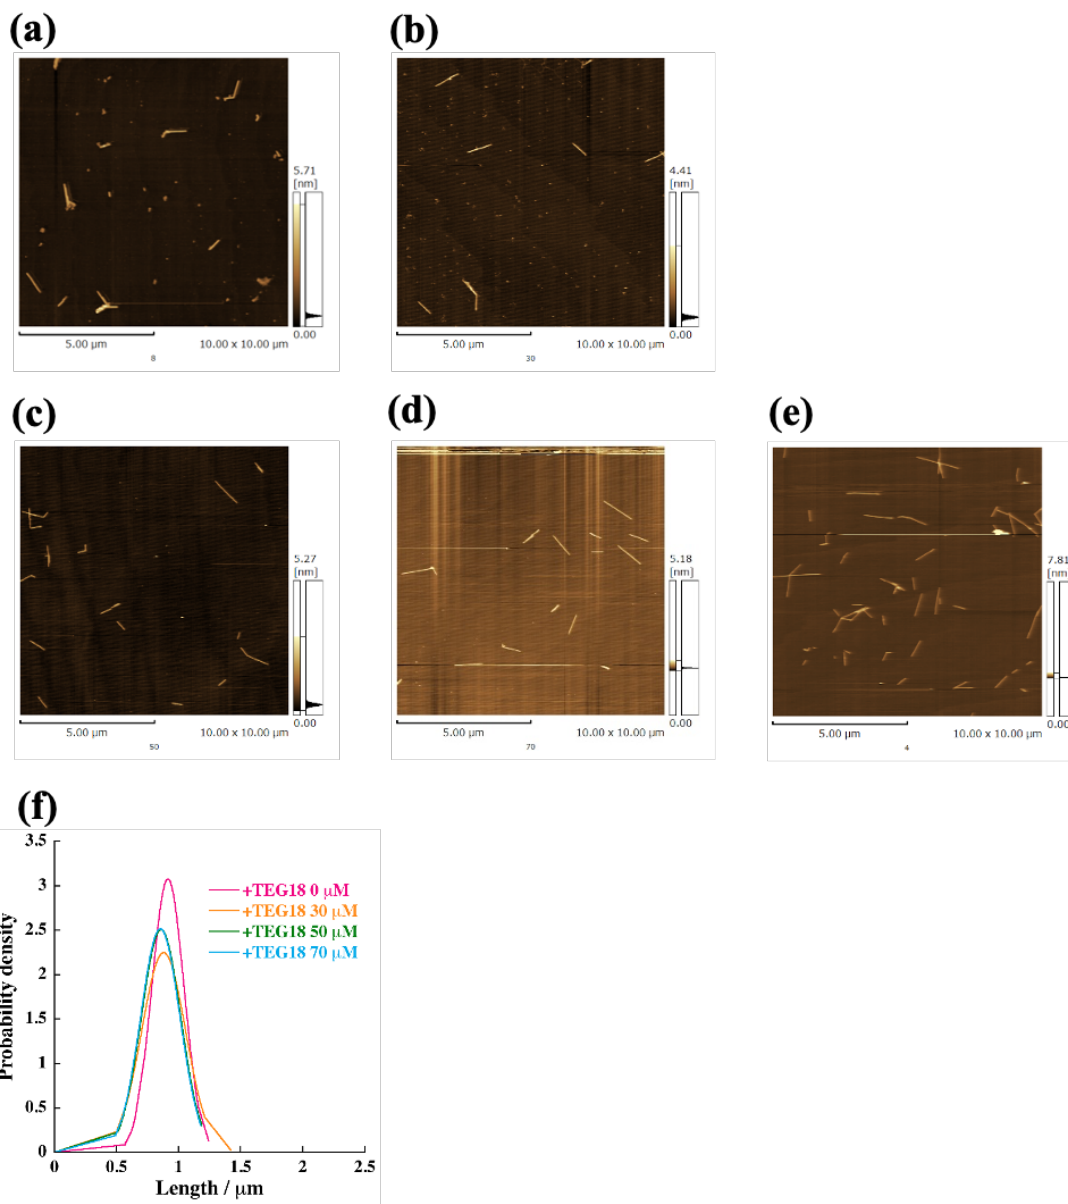

Fig. S12. (a–d) Concentration-dependent AFM images of supramolecular polymer prepared upon addition of (a) 0, (b) 30, (c) 50, and (d) 70  $\mu\text{M}$  of  $\text{H}_2\text{TPPS}_2\text{-NHCO-EG}_{18}$ ; (e) AFM image of nanofibers prepared in vial upon addition of 70  $\mu\text{M}$  of  $\text{H}_2\text{TPPS}_2\text{-NHCO-EG}_{18}$ ; (f) length distributions of supramolecular polymers measured from AFM images of at least 300 fibers (values in inset: concentrations of added monomer).

## 5. Self-assembly behaviors of H<sub>2</sub>TPPS<sub>2</sub>-NH-EG<sub>x</sub> monomers in microflow channel

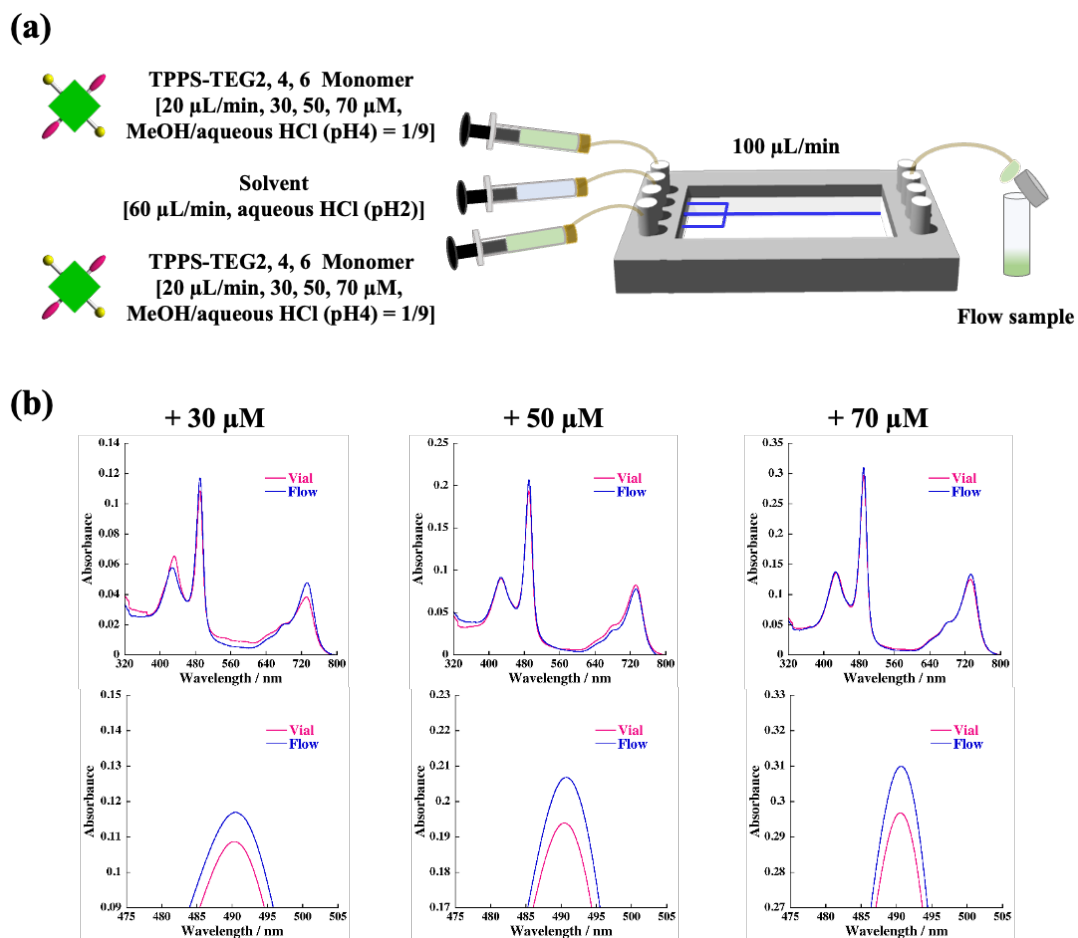

Fig. S13. (a) Schematic set-up for the present experiment; (b) concentration dependence of UV-vis spectra of the eluted solution (blue lines) upon addition of H<sub>2</sub>TPPS<sub>2</sub>-NHCO-EG<sub>2</sub>.



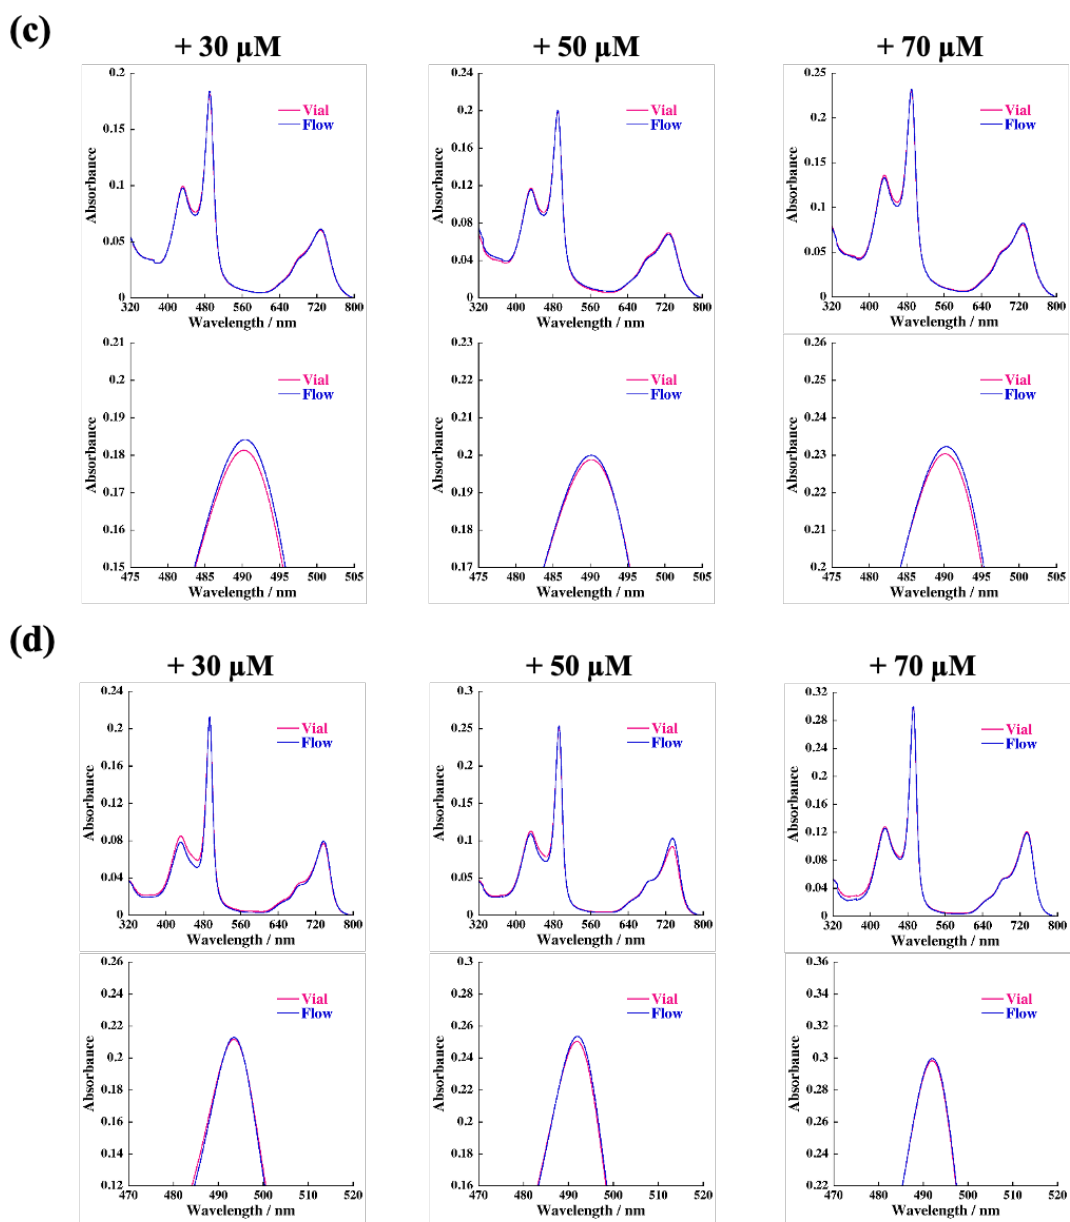

Fig. S13 continued. (c, d) concentration dependence of UV-vis spectra of the eluted solution (red lines) upon addition of (c)  $\text{H}_2\text{TPPS}_2\text{-NHCO-EG}_4$  and (d)  $\text{-EG}_6$  (red lines represent the corresponding vial sample) [1.0 mm cell, r.t.].

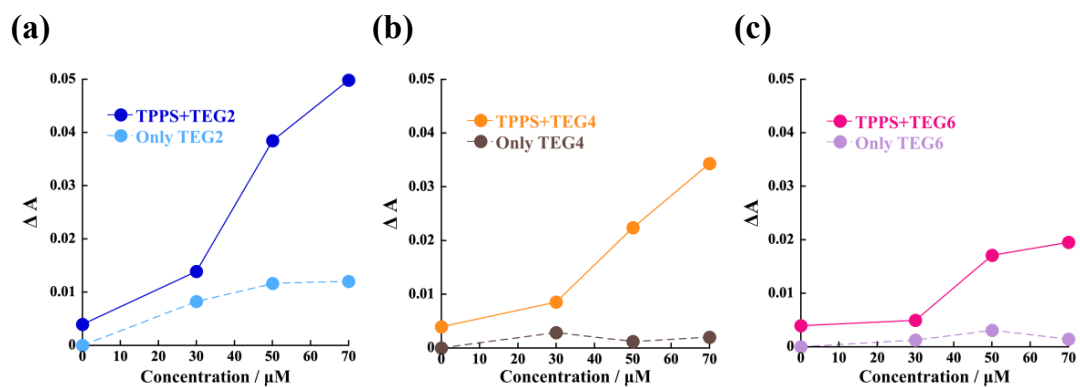

Fig. S14. Comparison of plots of  $\Delta A$  at 490 nm against  $H_2TPPS_2-NHCO-EG_x$  monomer concentration; solid lines correspond to the degree of supramolecular copolymerization and dotted lines represent supramolecular polymerization of monomer in microflow channel, obtained from the data in Fig. S13; (a)  $H_2TPPS_2-NHCO-EG_2$ , (b)  $-EG_4$ , and (c)  $-EG_6$ .

## 6. Flow-rate-dependent-self-assembly of series of $H_2TPPS_2-NHCO-EG_x$ monomers in microflow channel

We investigated the inherent reactivity of each monomer ( $H_2TPPS_2-NHCO-EG_x$ ) under laminar flow. According to the setup for supramolecular copolymerization, a solution of the monomer was injected from the two-sided inlet into the microflow channel, and aqueous HCl was injected from the central leg instead of a solution of the  $H_4TPPS_4$  supramolecular polymer. The UV-vis spectra of the eluted solutions revealed a clear steric effect of the EG units on the self-assembly ability; that is, the characteristic band corresponding to J-aggregates appeared only for the  $H_2TPPS_2-NHCO-EG_2$  and  $-EG_4$  monomers. In the case of  $H_2TPPS_2-NHCO-EG_6$  having medium-sized peripherals, a small amount of J-aggregate was formed in addition to a significant amount of the protonated form that remained unreacted.

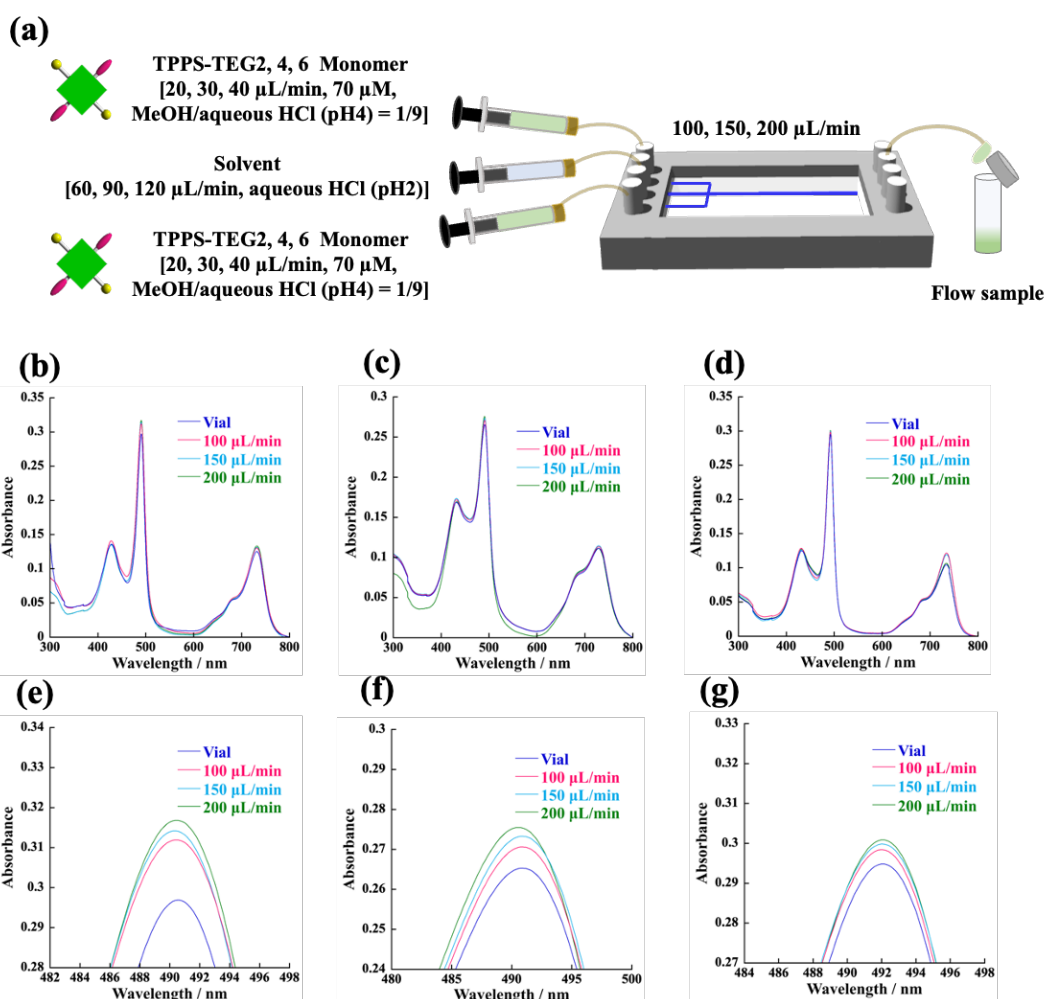

Fig. S15. (a) Schematic set-up for the present experiment; (b-d) flow rate dependence of UV-vis spectra of the eluted solution; (e), (f) and (g) are enlarged spectra of (b), (c), and (d), respectively [the inset values represent the flow rates (blue lines correspond to the vial sample), 1.0 mm cell; r.t.].

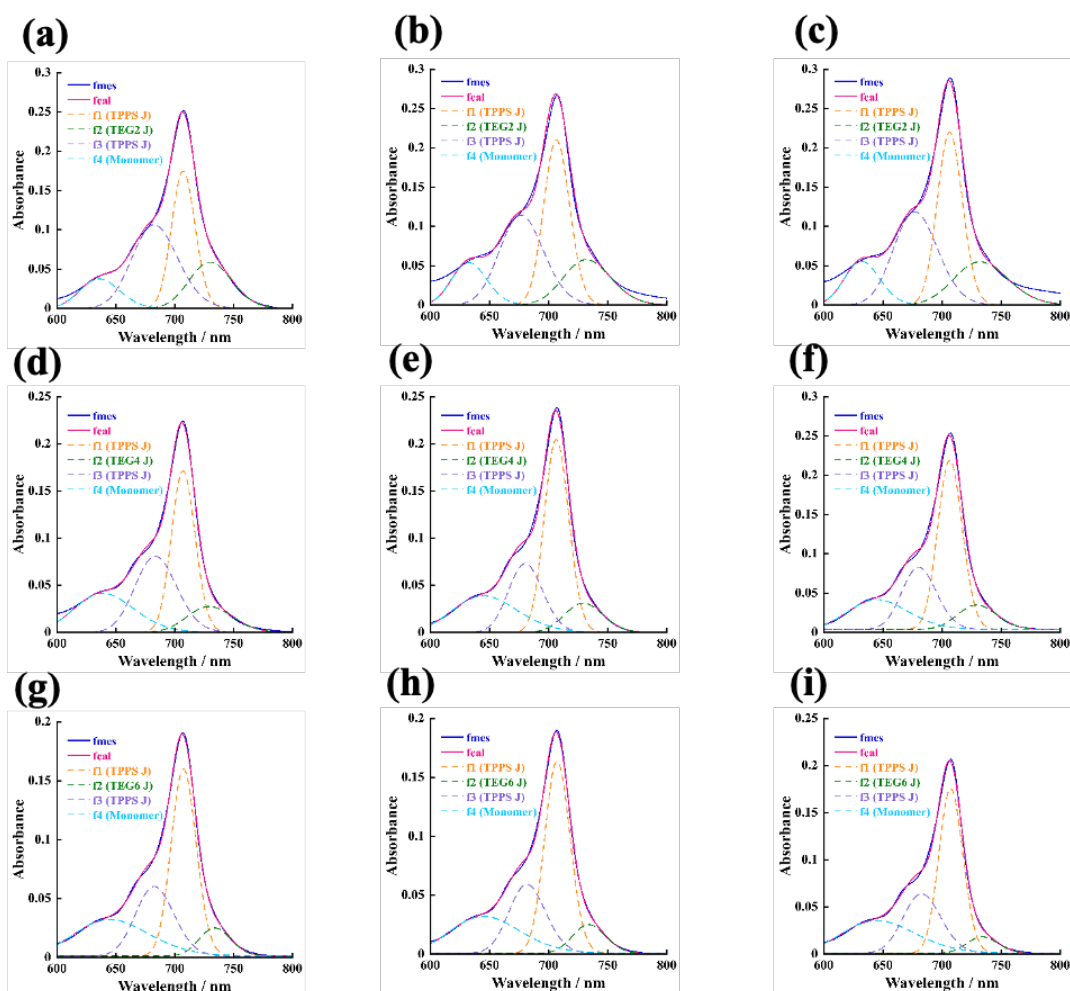

Fig. S16. Deconvoluted UV-vis spectra of the eluted solution collected at rate of (a, d, g) 100, (b, e, h) 150, and (c, f, i) 200  $\mu\text{L}/\text{min}$  in the presence of 70  $\mu\text{M}$  (a, b, c)  $\text{H}_2\text{TPPS}_2\text{-NHCO-EG}_2$ , (d, e, f)  $\text{H}_2\text{TPPS}_2\text{-NHCO-EG}_4$ , and (g, h, i)  $\text{H}_2\text{TPPS}_2\text{-NHCO-EG}_6$  monomer [1.0 mm cell, r.t., concentration of injected solution of  $\text{H}_4\text{TPPS}_4$  supramolecular polymer was fixed at 40  $\mu\text{M}$ . Inset—blue lines: measured spectra, magenta: calculated spectra, f1 orange:  $\text{H}_4\text{TPPS}_4$  J-aggregate, f2 green:  $\text{H}_4\text{TPPS}_2\text{-NHCO-EG}_x$  ( $x = 2, 4, \text{ or } 6$ ) aggregate, f3 purple: second band of  $\text{H}_4\text{TPPS}_4$  J-aggregate, f4 light-blue: unreacted  $\text{H}_4\text{TPPS}_4$  monomer].

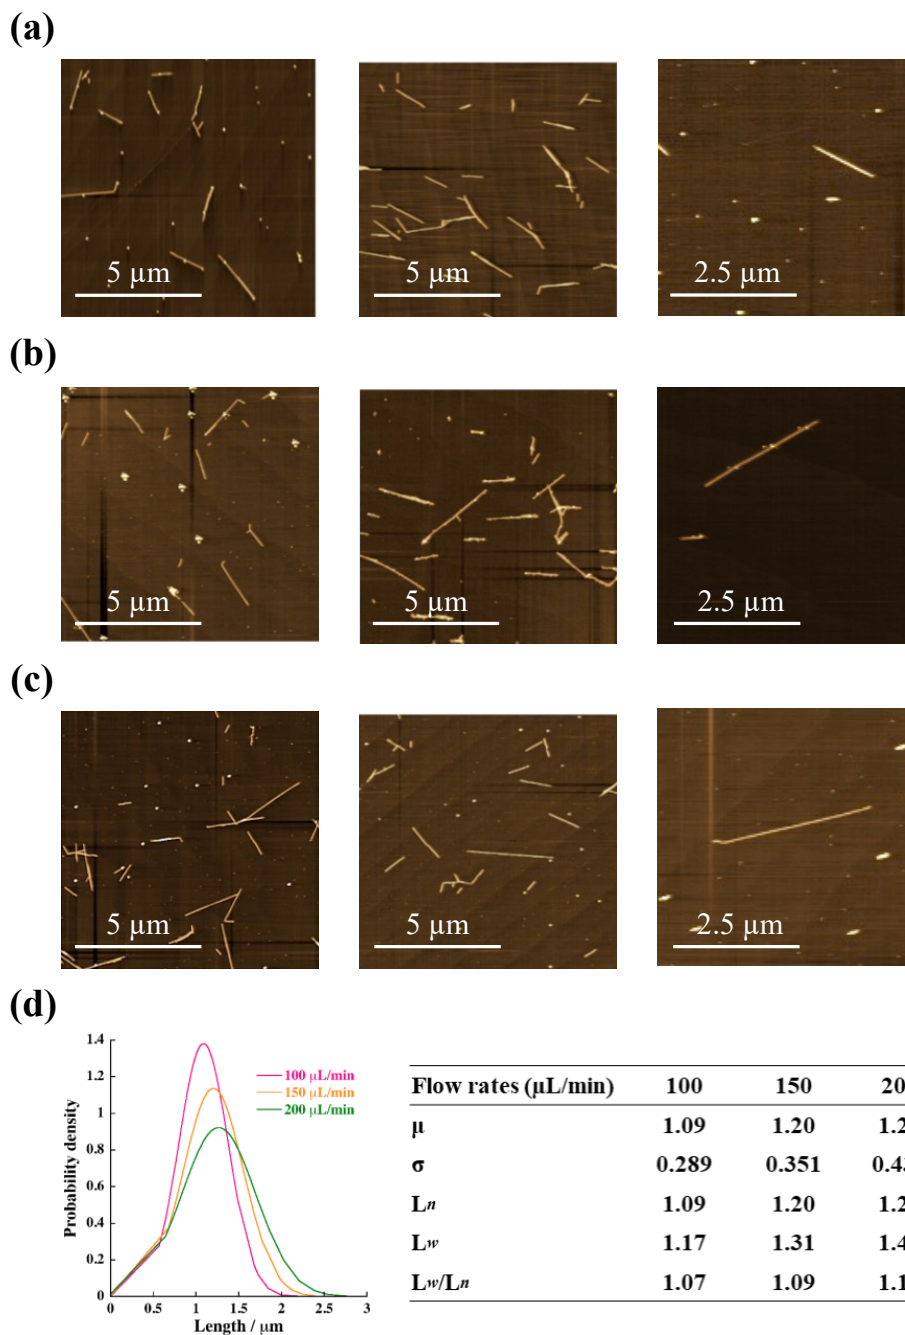

Fig. S17. Flow-rate dependence of AFM images of supramolecular diblock copolymers obtained upon injection of  $\text{H}_2\text{TTPS}_2\text{-NHCO-EG}_2$  solution at (a) 100, (b) 150, and (c) 200  $\mu\text{L}/\text{min}$ ; (d) length distributions of supramolecular diblock copolymers measured from AFM images of at least 300 fibers (values in inset represent flow rates) and characteristics of the resultant polymers;  $\mu$ : mean length ( $\mu\text{m}$ );  $\sigma$ : standard deviation of measured lengths;  $L_n$ : number-average length;  $L_w$ : weight-average length;  $L_w/L_n$ : dispersity.

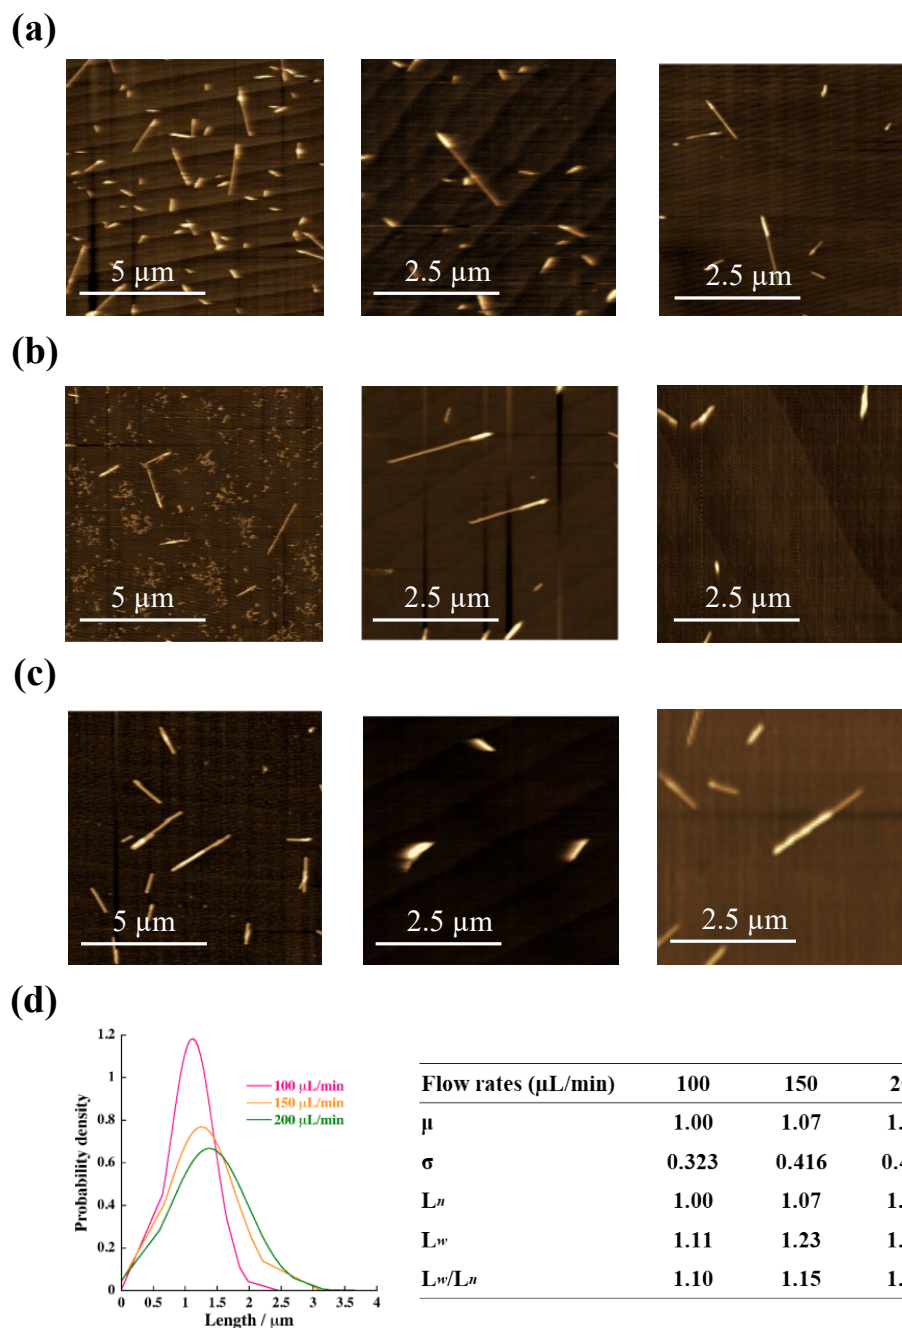

Fig. S18. Flow-rate dependence of AFM images of supramolecular diblock copolymers obtained upon injection of  $\text{H}_2\text{TTPS}_2\text{-NHCO-EG}_4$  solution at (a) 100, (b) 150, and (c) 200  $\mu\text{L}/\text{min}$ ; (d) length distributions of supramolecular diblock copolymers measured from AFM images of at least 300 fibers (values in inset represent flow rates) and characteristics of the resultant polymers;  $\mu$ : mean length ( $\mu\text{m}$ );  $\sigma$ : standard deviation of measured lengths;  $L_n$ : number-average length;  $L_w$ : weight-average length;  $L_w/L_n$ : dispersity.

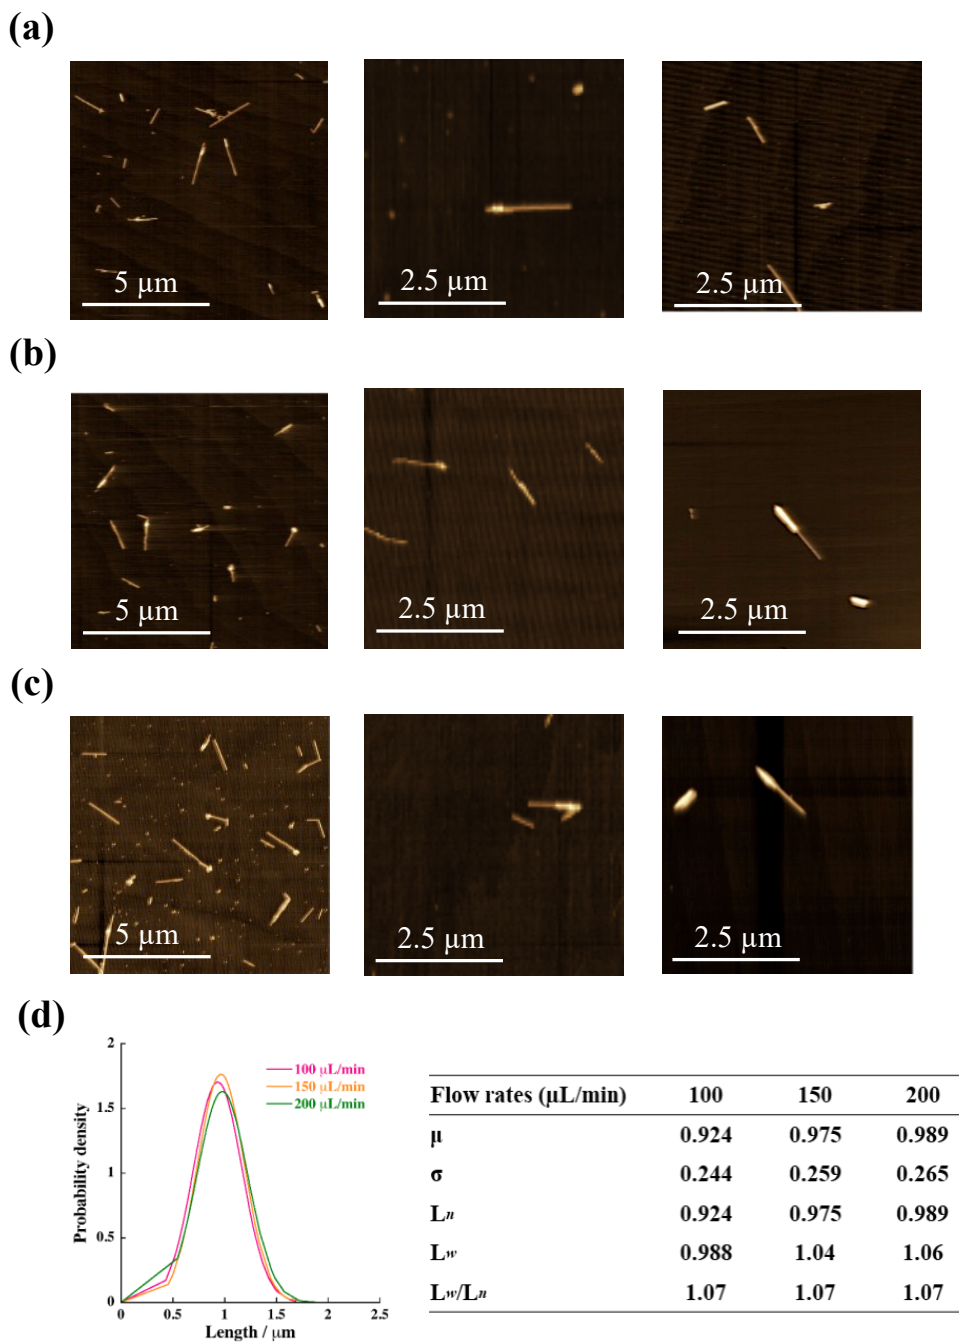

Fig. S19. Flow-rate dependence of AFM images of supramolecular diblock copolymers obtained upon injection  $\text{H}_2\text{TTPS}_2\text{-NHCO-EG}_6$  solution at (a) 100, (b) 150, and (c) 200  $\mu\text{L}/\text{min}$ ; (d) length distributions of supramolecular diblock copolymers measured from AFM images of at least 300 fibers (values in inset represent flow rates) and characteristics of the resultant polymers;  $\mu$ : mean length ( $\mu\text{m}$ );  $\sigma$ : standard deviation of measured lengths;  $L_n$ : number-average length;  $L_w$ : weight-average length;  $L_w/L_n$ : dispersity.

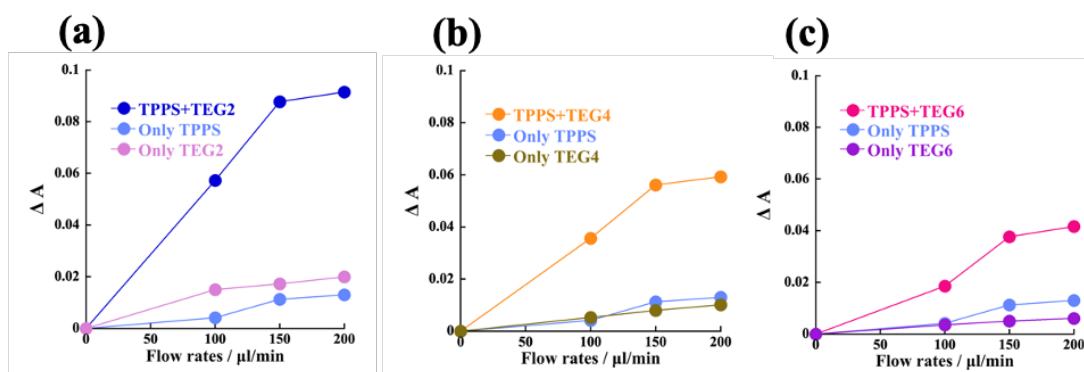

Fig. S20. Comparative plots of  $\Delta A$  at 490 nm with respect to flow rate; flow-rate-dependent supramolecular copolymerization of  $H_4TPPS_4$  supramolecular polymer with (a)  $H_2TPPS_2-NHCO-EG_2$  (blue line), (b)  $H_2TPPS_2-NHCO-EG_4$  (orange line), and (c)  $H_2TPPS_2-NHCO-EG_6$  (magenta line) monomers; in each spectrum,  $\Delta A$  values obtained upon solely injecting  $H_4TPPS_4$  supramolecular polymer or  $H_2TPPS_2-NHCO-EG_x$  ( $x = 2, 4, \text{ or } 6$ ) monomer are also plotted for comparison.

To gain further insights into the detailed extension mechanism, the rates of the reaction of the parent  $H_4TPPS_4$  polymers with the  $H_2TPPS_2-NHCO-EG_4$  or  $-EG_6$  monomer were evaluated by counting the number of diblock copolymers. The number of block copolymers increased with increasing monomer concentration, suggesting that both monomers were consumed at a comparable rate in the microflow (Figs. S21a and 21b).

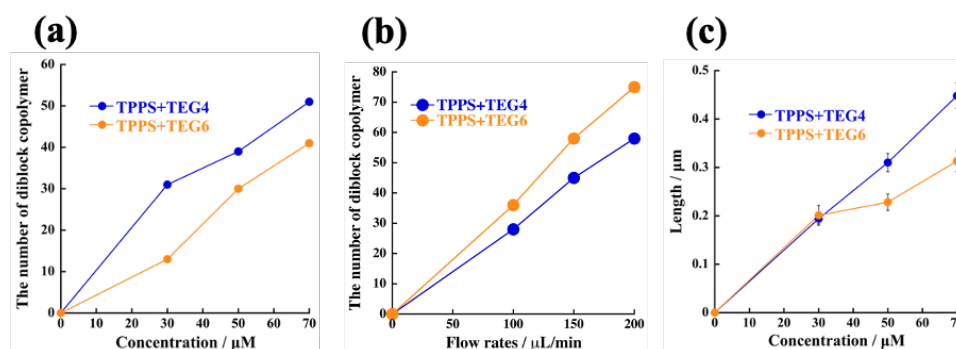

Fig. S21. Plots of the number of supramolecular diblock copolymers with respect to (a) monomer concentration and (b) flow rate, evaluated by counting 300 fibers in AFM images; (c) plot of the extended domain length in the diblock copolymer with respect to monomer concentration, measured from AFM images of 300 fibers; blue and orange lines correspond to supramolecular diblock copolymers obtained upon reaction with  $H_2TPPS_2-NHCO-EG_4$  and  $-EG_6$  monomer, respectively.



## 7. Effects of thermal diffusion of monomer on supramolecular copolymerization

To further confirm that the diffusion rates of monomers affect the efficiency of supramolecular copolymerization, the lateral layers including  $H_2TPPS_2-NHCO-EG_4$  were selective heated by means of Peltier device as illustrated in Fig. S22 a. We confirmed that absorption at 490 nm increased with increasing the temperature of the Peltier device (Figs S22b and S22c). This result was evident that the diffused monomers from the lateral layer reacted at the end of  $H_4TPPS_4$  supramolecular polymer in the central layer.

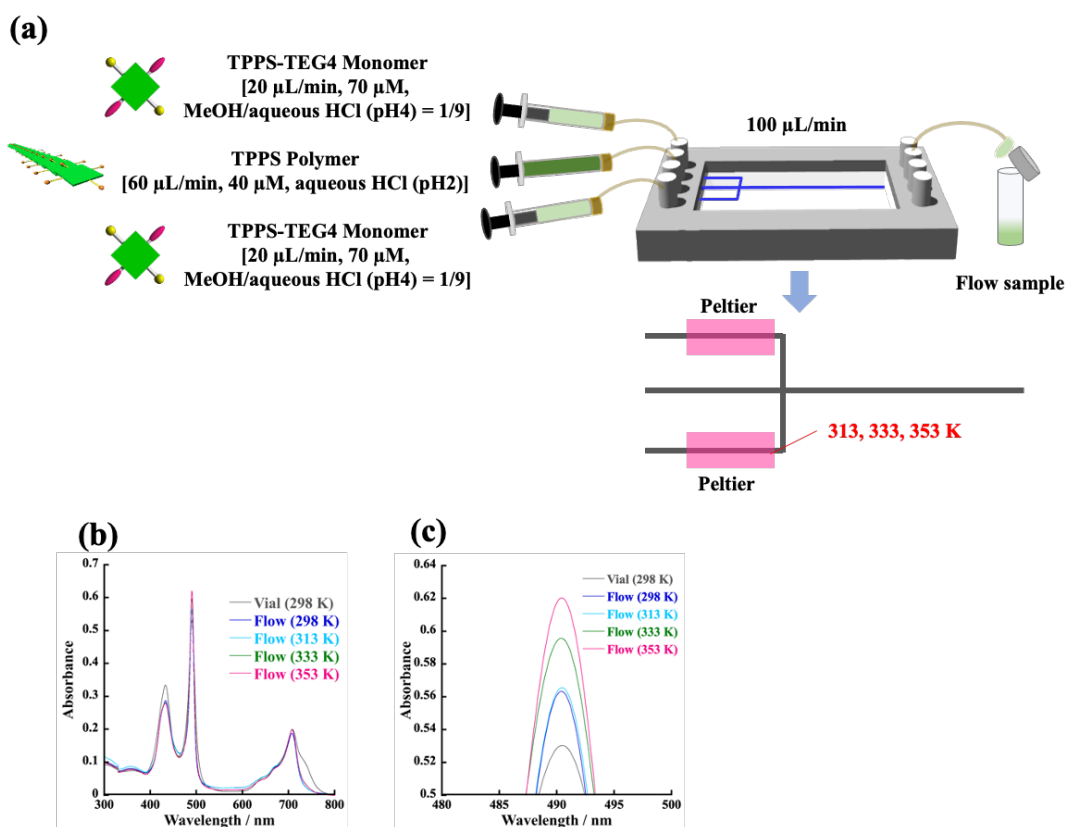

Fig. S22. (a) Schematic of microflow set-up for the present experiment using Peltier devices; heating effect of the lateral monomer ( $H_2TPPS_2-NHCO-EG_4$ ) layers on the supramolecular copolymerization; (b) temperature-dependent UV-vis spectral changes of the eluted solution; (c) enlarged spectra of (b) [the inset values represent the temperature of the Peltier devices, 1.0 mm cell].

As a reference experiment, to investigate whether the heating treatment caused the decomposition of the parent  $H_4TPPS_4$  supramolecular polymer in the central layer, we injected MeOH/water mixed solvent from the lateral inlets (without  $H_2TPPS_2-NHCO-EG_4$  monomer), and heated the lateral channel by the Peltier device (Fig. S23 a). As a result, no significant effect of the heating on the stability of the supramolecular polymer (Fig. S23b).

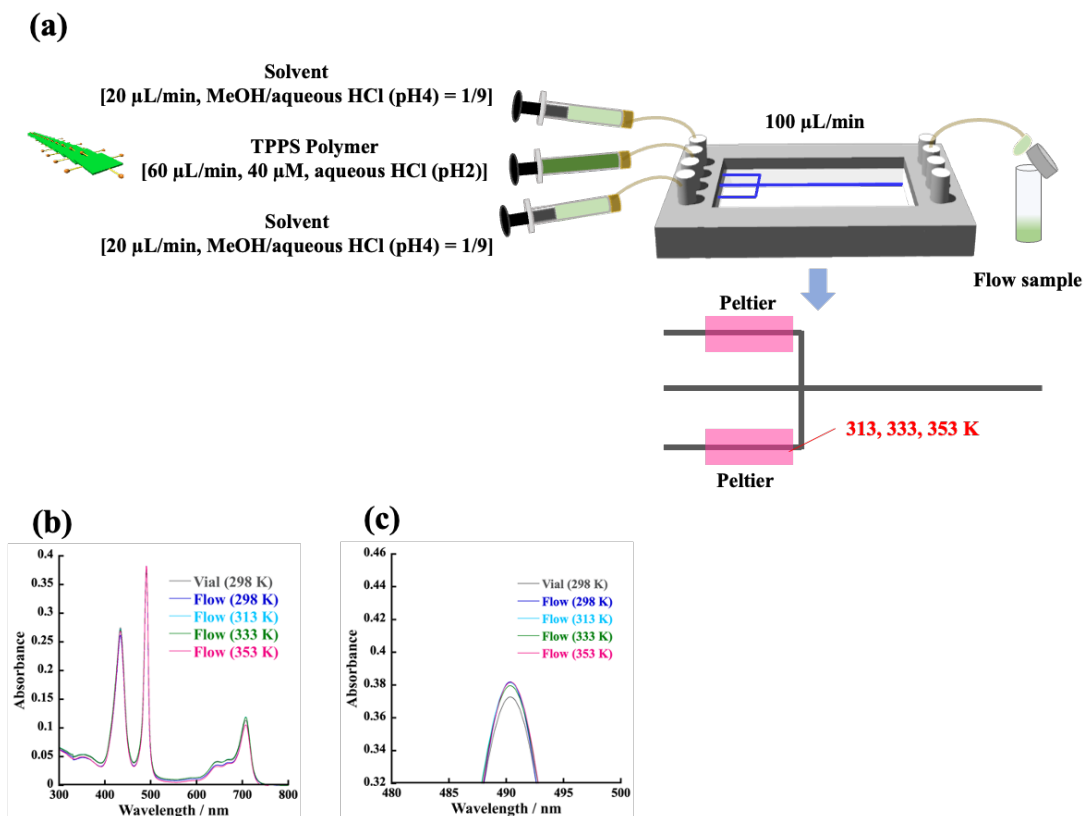

Fig. S23. (a) Schematic of microflow set-up for the reference experiment using Peltier devices; selective heating of the two lateral solvent layers; (b) temperature-dependent UV-vis spectral changes of the eluted solution; (c) enlarged spectra of (b) [the inset values represent the temperature of the Peltier devices, 1.0 mm cell].

No significant effect of the heating treatment on the homoaggregate of  $H_2TPPS_2-NHCO-EG_4$  was also confirmed upon injection of solvent into the central channel (Fig. S24 a). Fig. S24 b was confirmed that no homoaggregate occurred in a microflow channel. The plots summarized in Fig. S24 c confirmed the clear correlation between the thermal diffusion of  $H_2TPPS_2-NHCO-EG_4$  and the efficiency of the supramolecular copolymerization. From these experiments, it can be reasonably concluded that collision frequency plays an essential role for the present supramolecular copolymerization.

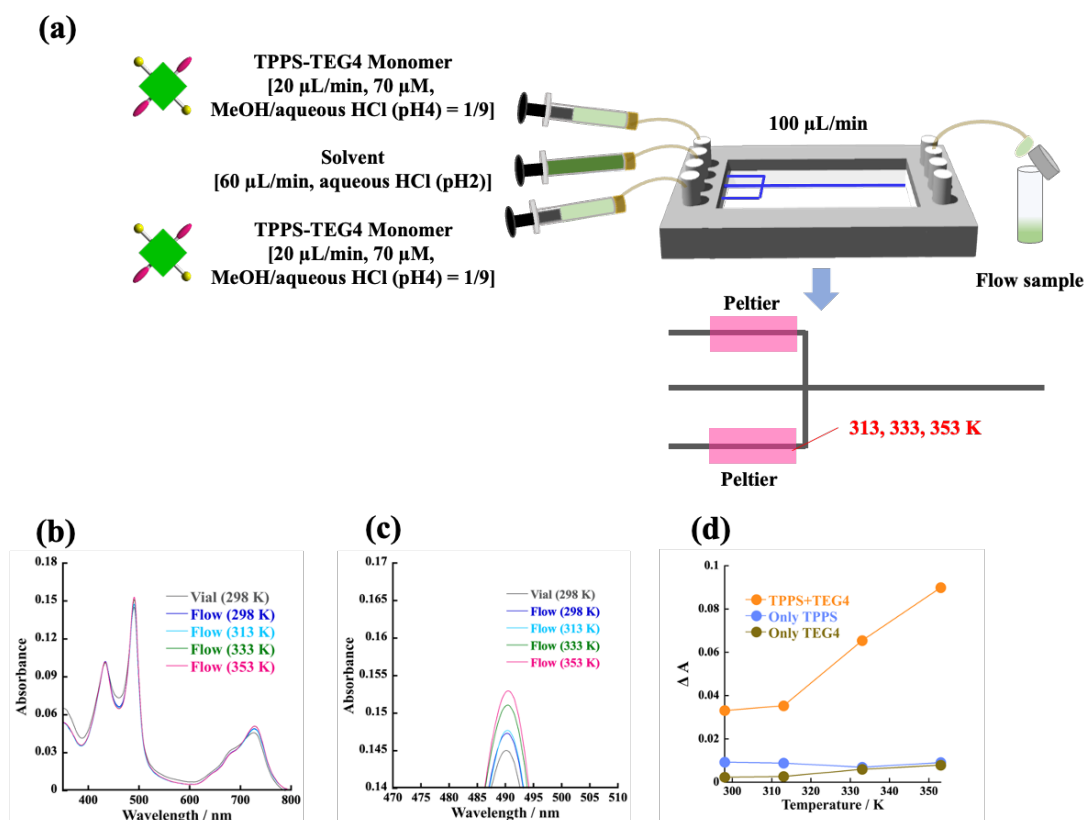

Fig. S24. (a) Schematic of microflow set-up for the reference experiment using Peltier devices; selective heating of the two lateral monomer layers; (b) temperature-dependent UV-vis spectral changes; (c) enlarged spectra of (b) [the inset values represent the temperature of the Peltier devices, 1.0 mm cell]; (d)  $\Delta A$  at 490 nm versus temperature; orange line shows the effect of heating on the supramolecular copolymerization (data obtained from Fig. S22b); blue line represents data obtained from Fig. S23b; that is, upon sole injection of  $H_4TPPS_4$  supramolecular polymer into the central inlets (without  $H_2TPPS_2-NHCO-EG_4$  monomer); brown line represents data obtained from Fig. S24b; that is, upon sole injection of  $H_2TPPS_2-NHCO-EG_4$  monomer into the side inlets (without  $H_4TPPS_4$  supramolecular polymer).

## 8. References

1. C. Kanzaki, H. Yoneda, S. Nomura, T. Maeda and M. Numata, *RSC Adv.* **2022**, *12*, 30670.
2. C. Kanzaki and M. Numata, *Chem. Lett.* **2023**, *52*, 37.
